# Supplementary material
Source: PubMed Central journal article supplement (PMC6126387)

# Supplementary Figure. 1

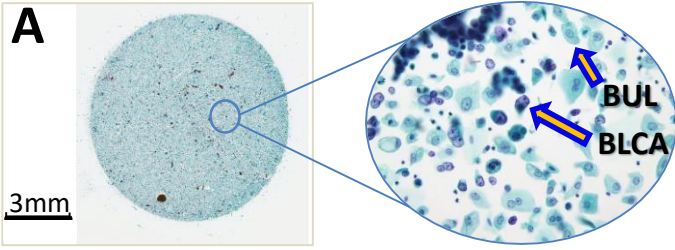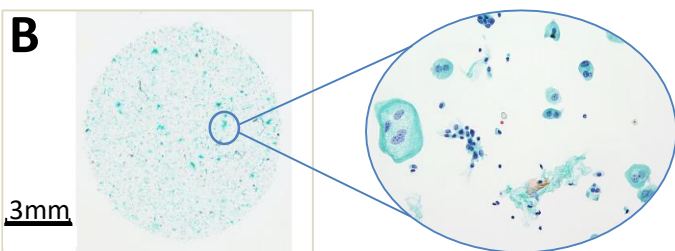

# Supplementary Figure. 2

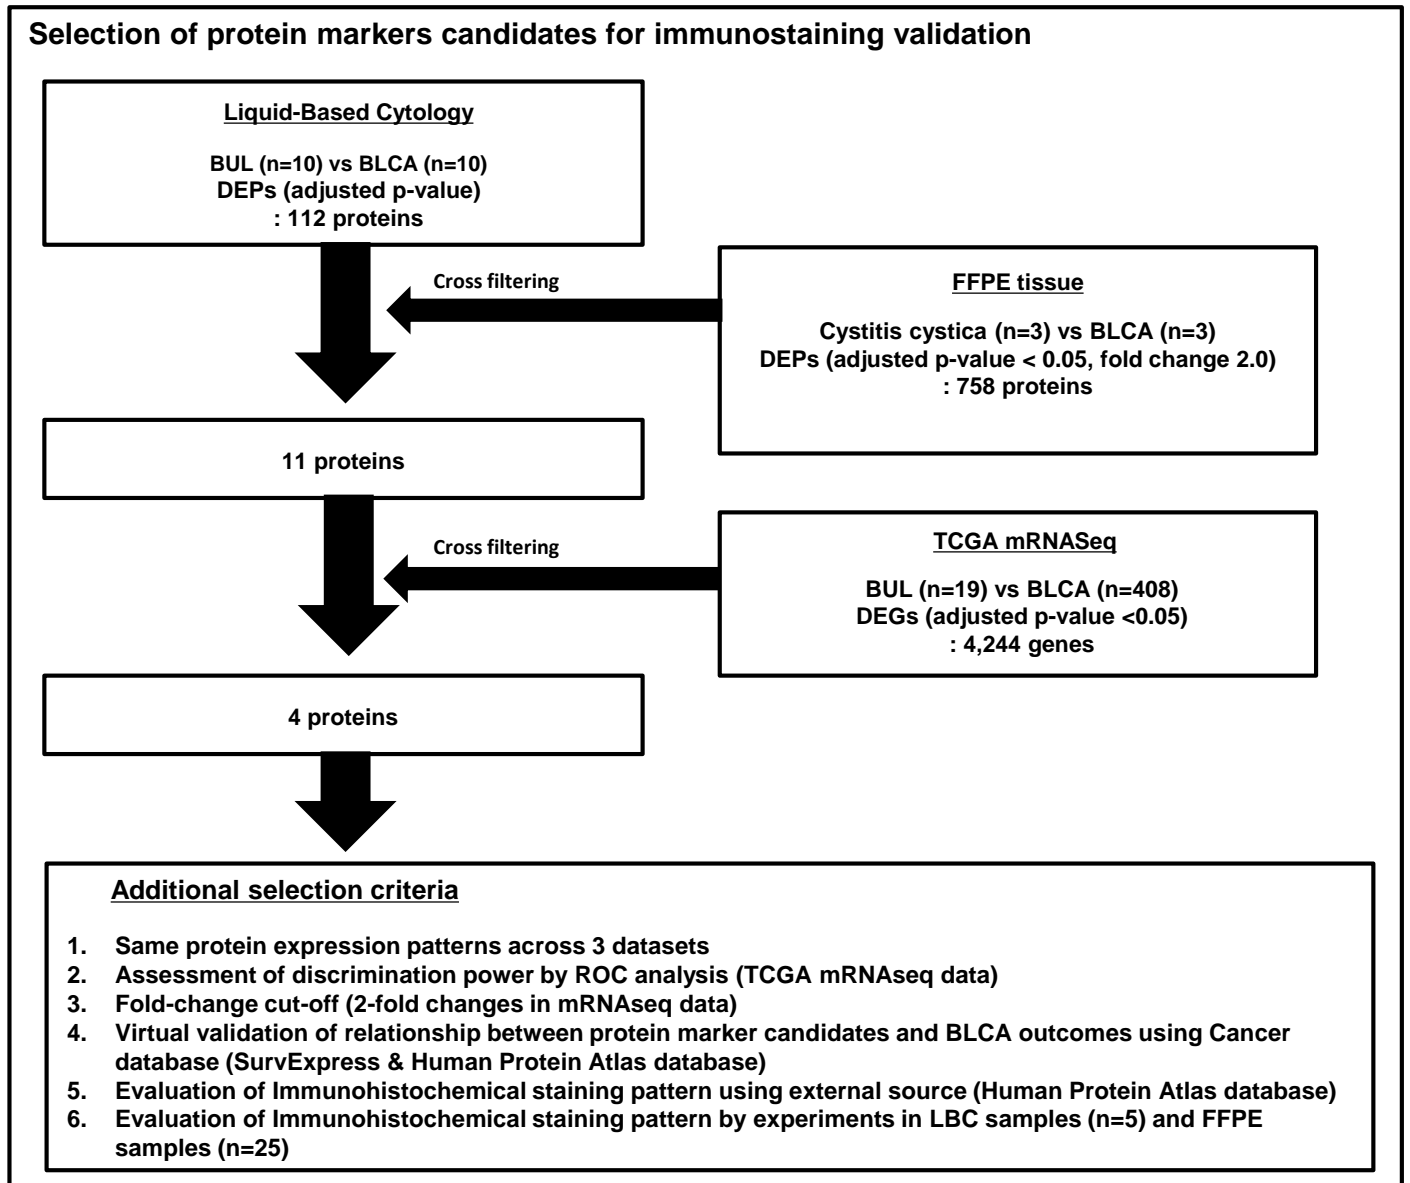



Supplementary Figure. 4

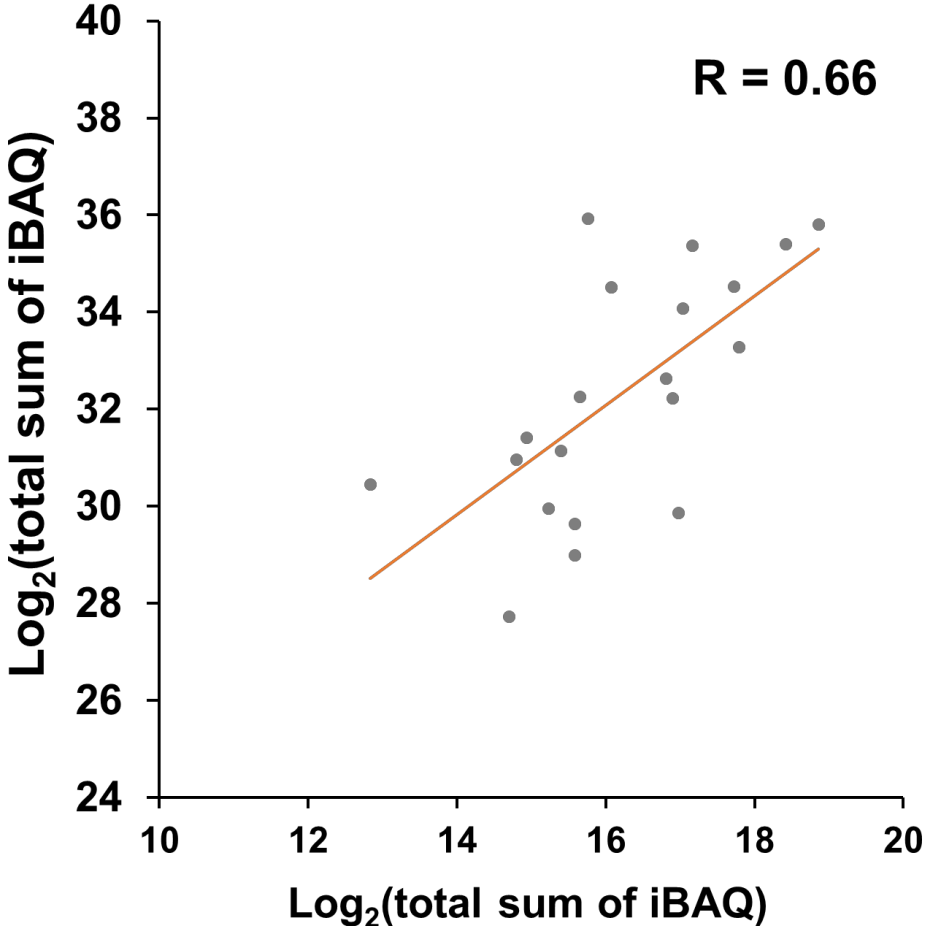

# Supplementary Figure. 5

## A Before normalization

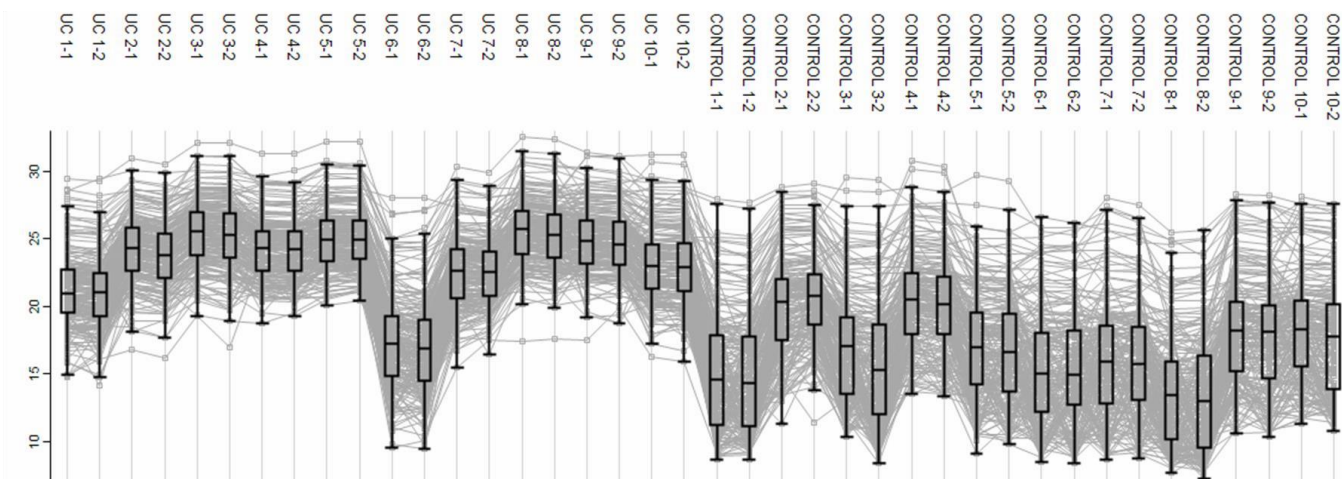

## B After normalization

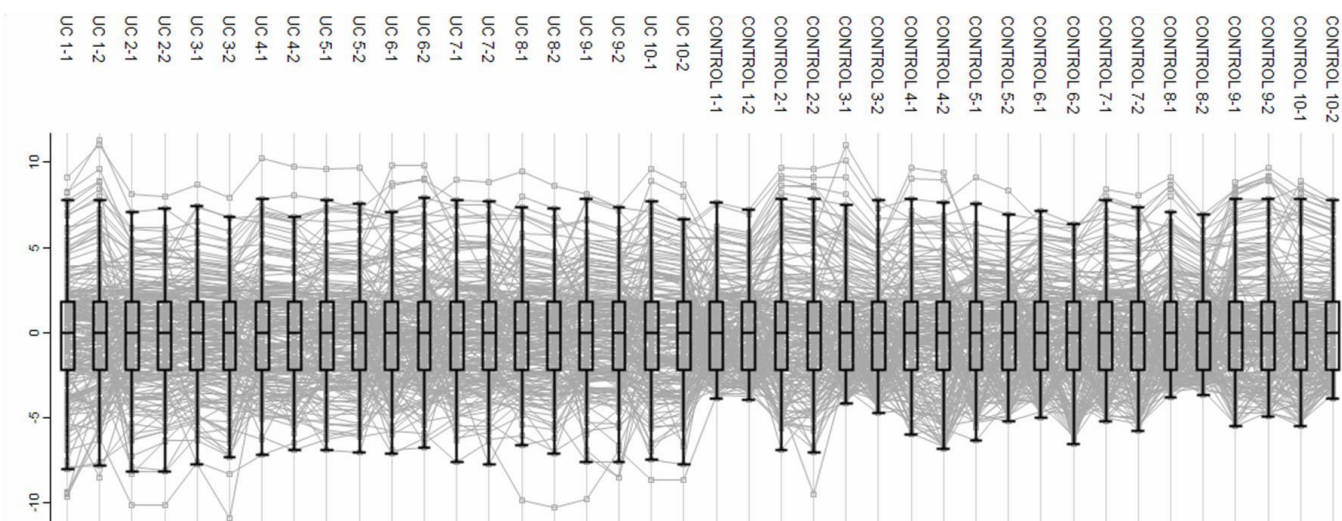

# Supplementary Figure. 6

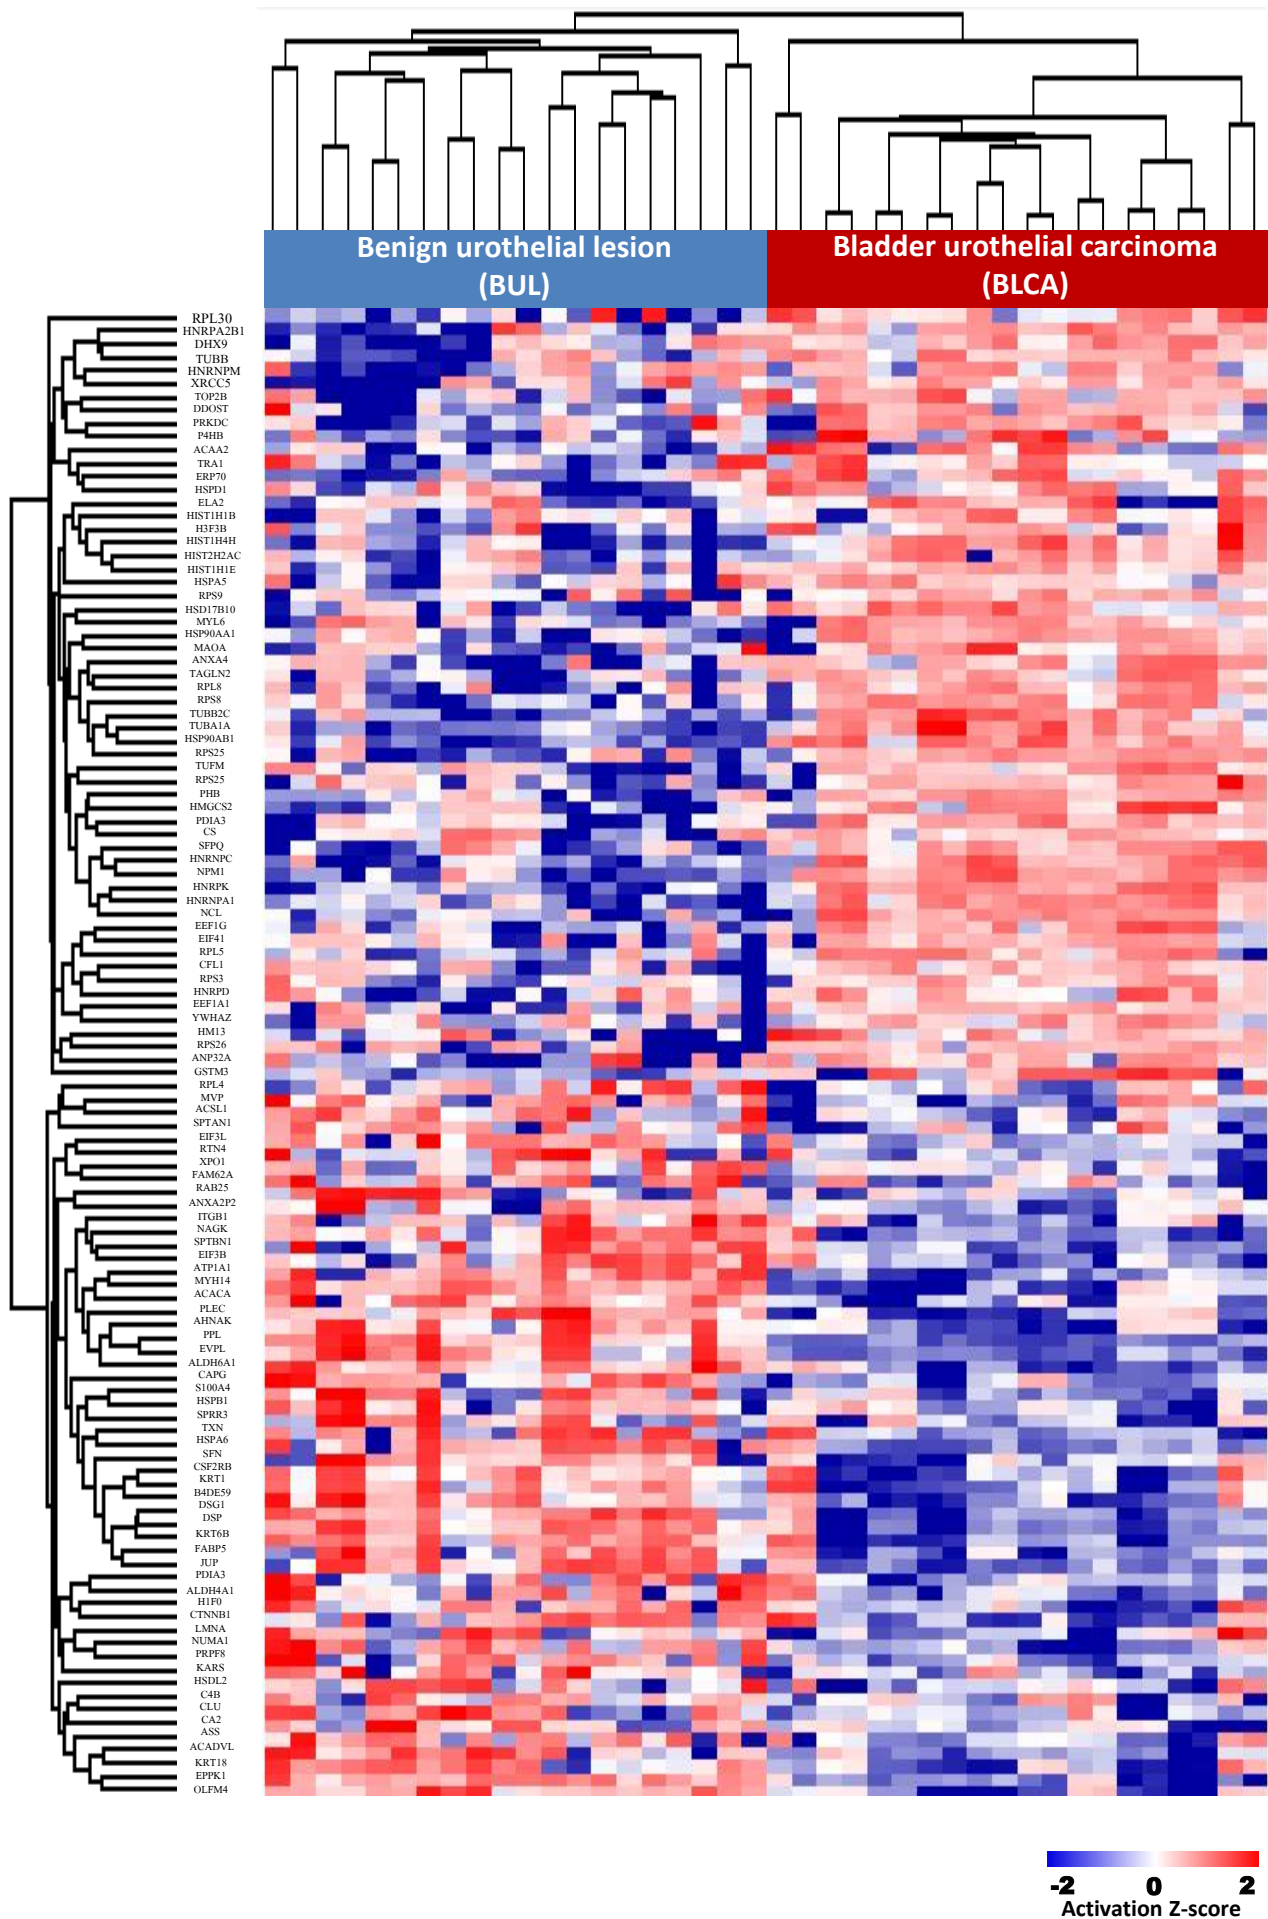

# Supplementary Figure. 7

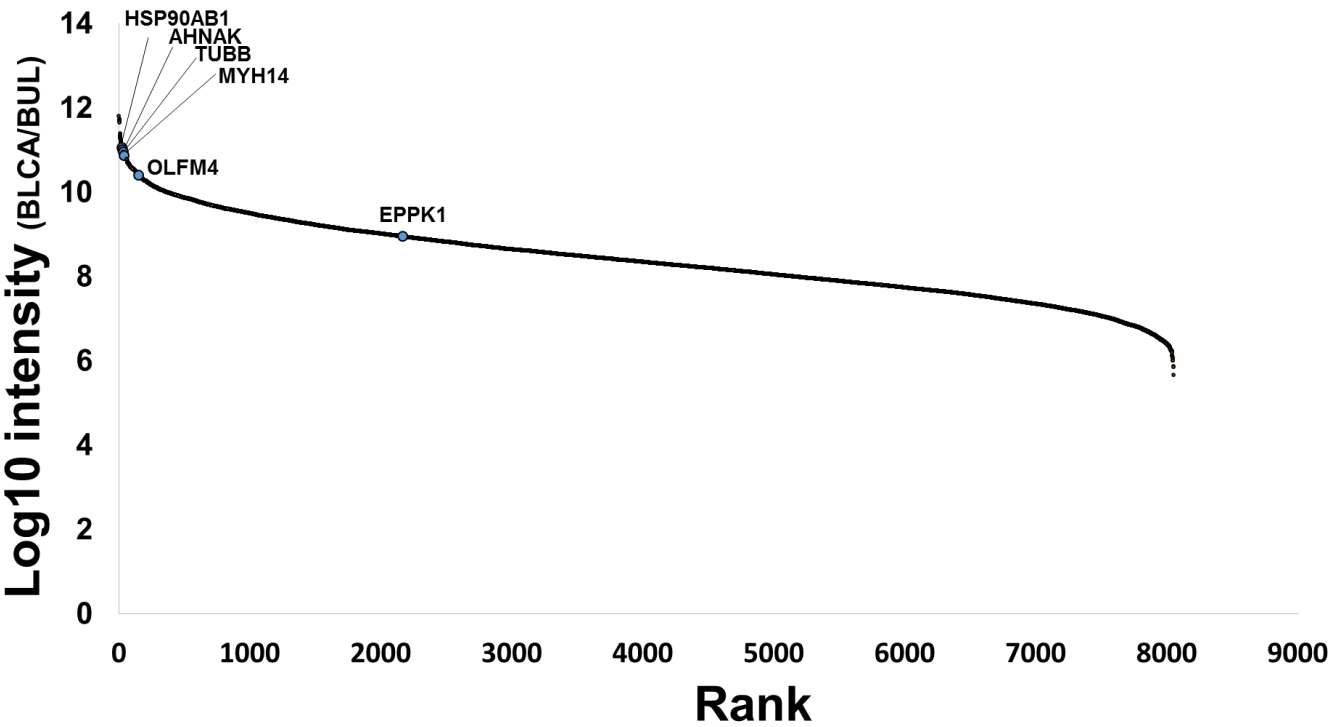

# Supplementary Figure. 8

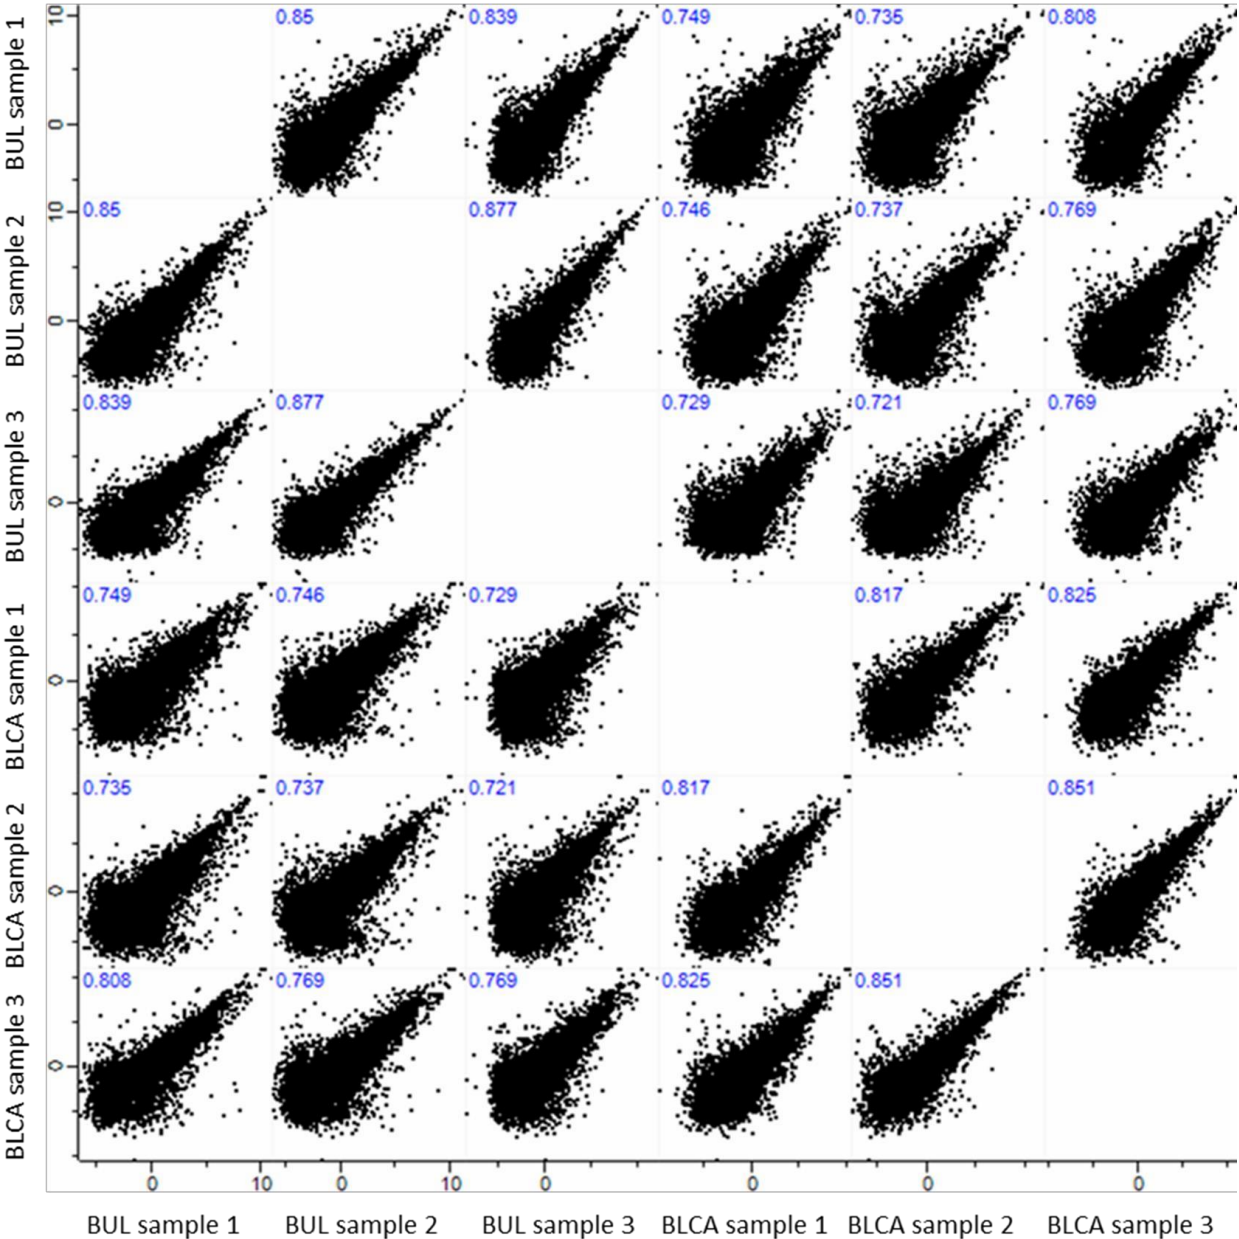



**Supplementary Figure. 9**

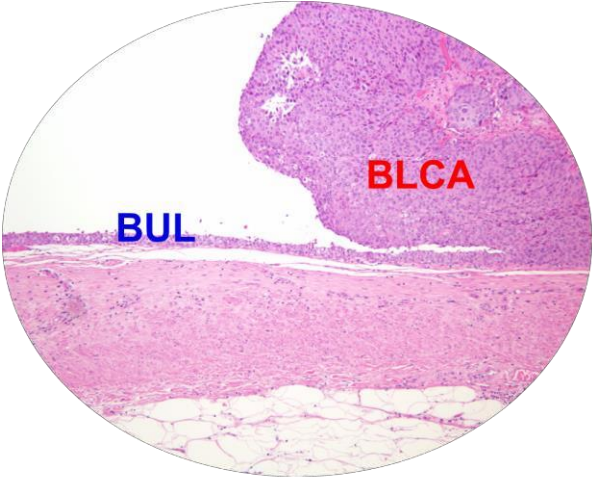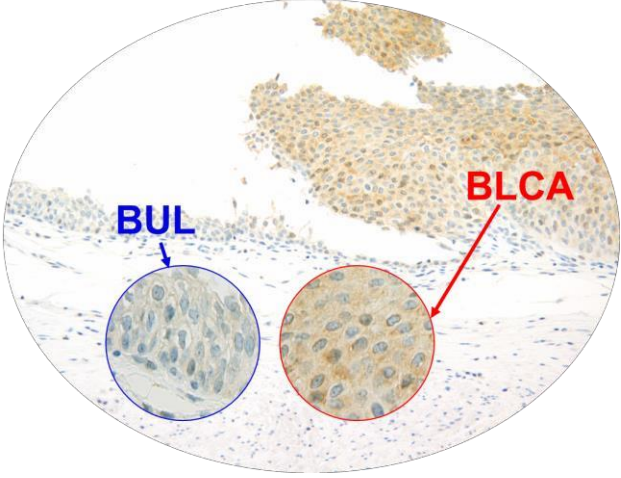

# Supplementary Figure. 10

## SurvExpress dataset

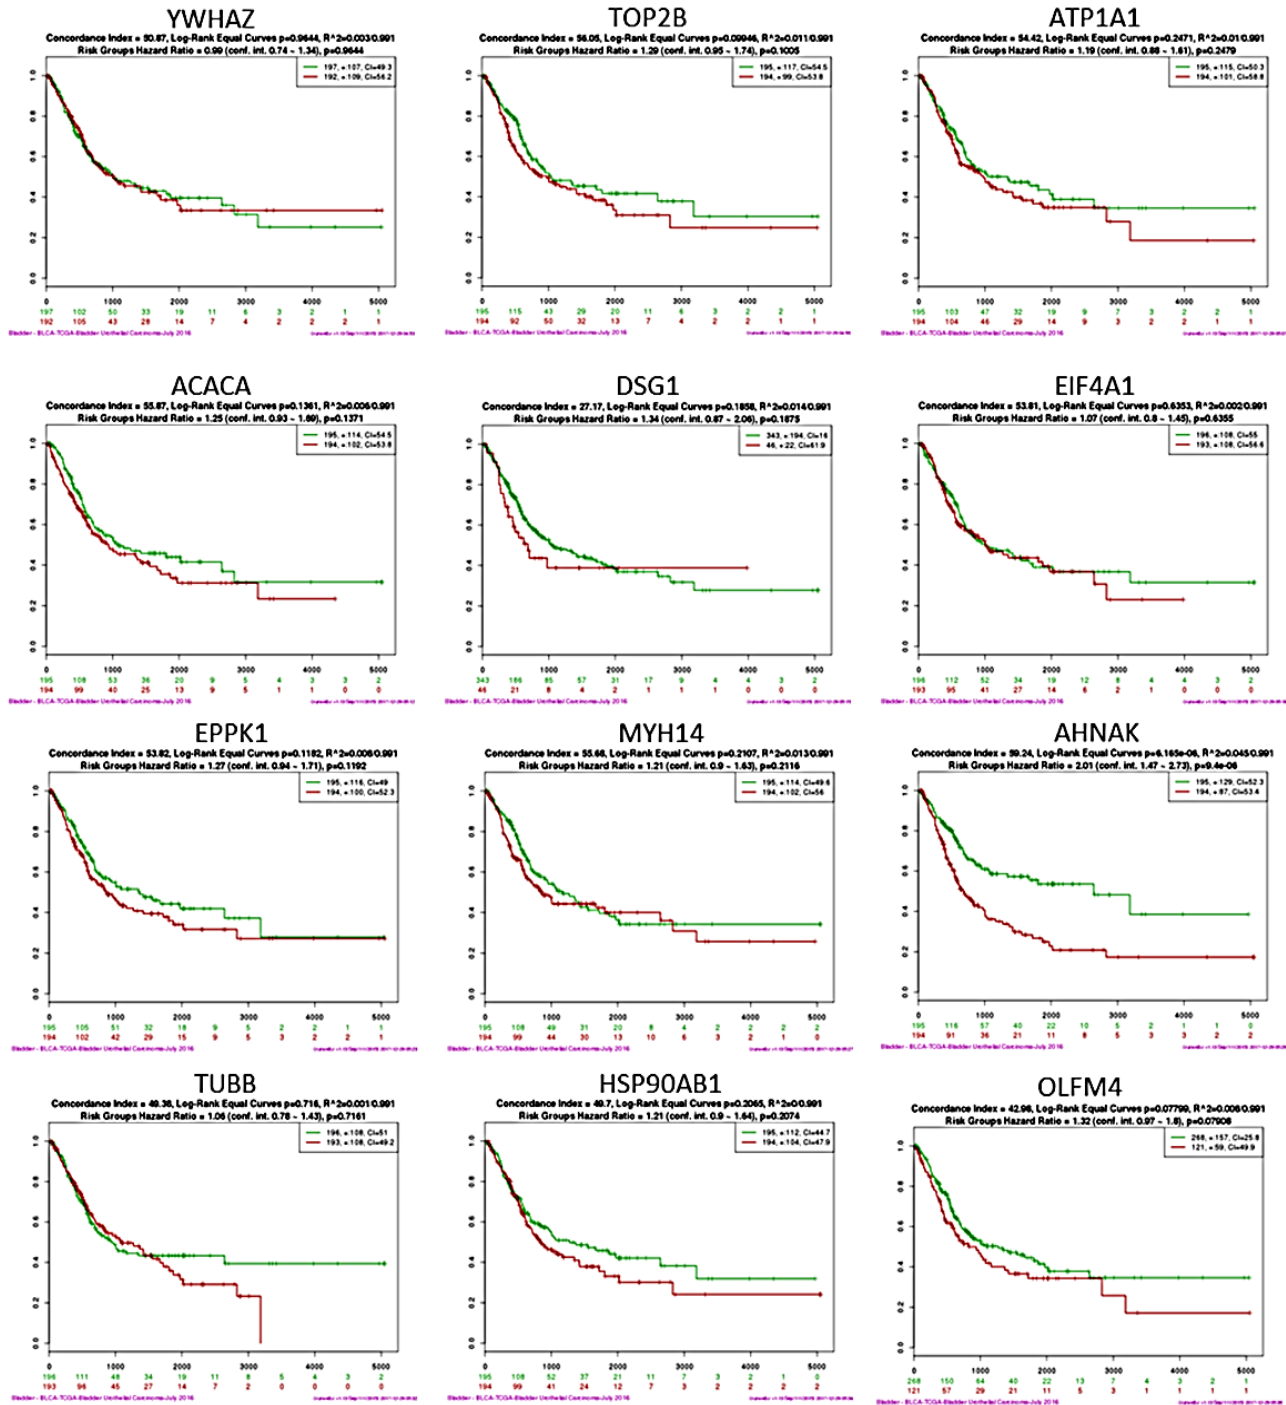

# Supplementary Figure. 11

## Human Protein Atlas data set

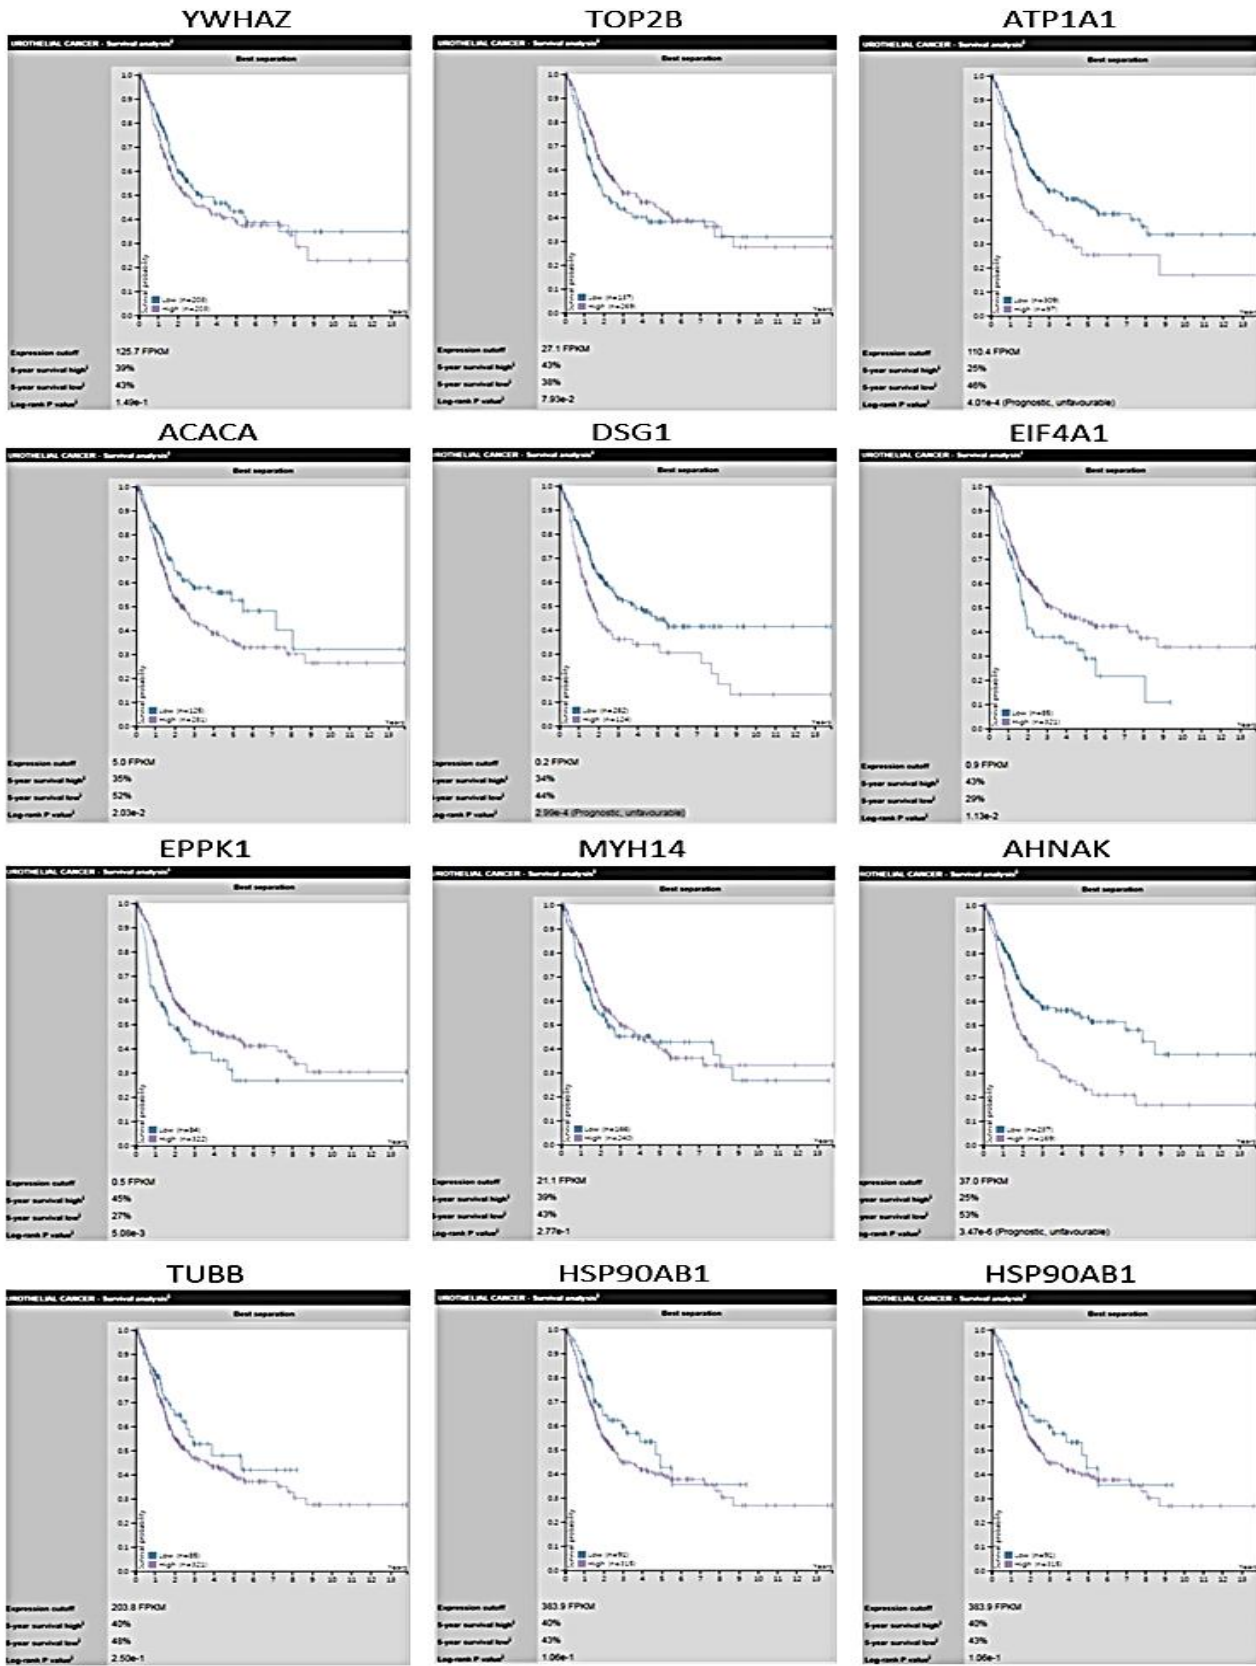

Supplement: 134836_2_supp_158808_p5szjv.pdf [file 134836_2_supp_158808_p5szjv.pdf]
